# Supplementary material
Source: PubMed Central journal article supplement (PMC5640987)
Supplement: NIHMS73860-supplement-Supplementary_Information_Guide.pdf [file NIHMS73860-supplement-Supplementary_Information_Guide.pdf]

## **Supplementary Information guide**

SI Table 1: Yeast strains used in this study

SI Video 1: Docking of mTORC1 structure into yeast TOROID map

SI Figure 1: Raw images of western blots from main text Figures 1 and 4
