# Supplementary material
Source: PubMed Central journal article supplement (PMC5640987)
Supplement: NIHMS73860-supplement-Supplementary_Information_Table_1.pdf [file NIHMS73860-supplement-Supplementary_Information_Table_1.pdf]

| <b>Id</b> | <b>Name</b>                                        | <b>Genotype</b>                                                                  | <b>Reference</b> |
|-----------|----------------------------------------------------|----------------------------------------------------------------------------------|------------------|
| RL2500    | GFP-Kog1                                           | TB50 $\alpha$ , GFP(S65T)-Kog1                                                   | This study       |
| SKY222    | GFP-Tor1                                           | BY4741a, [LEU2]:GFP-Tor1                                                         | 45               |
| RL3013    | GFP-Tor1                                           | TB50 $\alpha$ , [LEU2]:GFP-Tor1                                                  | This study       |
| RL2905    | GFP-Kog1, Vph1-mCherry                             | TB50 $\alpha$ , GFP(S65T)-Kog1, Vph1-mCherry::[HpH]                              | This study       |
| RL2908    | GFP-Tor1, Vph1-mCherry                             | BY4741a, GFP-Tor1, Vph1-mCherry::[HpH]                                           | This study       |
| RL2906    | Lst8-GFP, Vph1-mCherry                             | TWY769a, Lst8-GFP::[HIS], Vph1-mCherry::[HpH]                                    | This study       |
| RL2583    | GFP-Kog1, Tco89-mCherry                            | TB50 $\alpha$ , GFP(S65T)-Kog1, Tco89-mCherry::[HpH]                             | This study       |
| RL2909    | GFP-Tor1, Tco89-mCherry                            | BY4741a, GFP-Tor1, Tco89-mCherry::[HpH]                                          | This study       |
| RL2480    | $\Delta gtr1$ , $\Delta gtr2$ , GFP-Kog1           | TB50, <i>gtr1</i> ::[HpH], <i>gtr2</i> ::[TRP1], GFP(S65T)-Kog1                  | This study       |
| RL2911    | Tor1-3xGFP, $\Delta tor2$ , pYpk2 <sup>D239A</sup> | TB50, Tor1-D330-3xGFP, <i>tor2</i> ::[KanMX4], YEp352::YPK2 <sup>D239A</sup> -HA | This study       |
| RL2952    | GFP-Tor1, $\Delta tor2$ , pYpk2 <sup>D239A</sup>   | TB50, [LEU2]:GFP-Tor1, <i>tor2</i> ::[KanMX4], YEp352::YPK2 <sup>D239A</sup> -HA | This study       |
| RL3014    | GFP-Tor1, $\Delta snf1$                            | TB50, [LEU2]:GFP-Tor1, <i>snf1</i> ::[KanMX4]                                    | This study       |
| RL3015    | GFP-Tor1, $\Delta gtr1$ , $\Delta gtr2$            | TB50, [LEU2]:GFP-Tor1, <i>gtr1</i> ::[HpH], <i>gtr2</i> ::[TRP1]                 | This study       |
| -         | Tor1-3xGFP                                         | TB50, Tor1-D330-3xGFP                                                            | 46               |
| RL3016    | Tor1-3xGFP, $\Delta gtr1$ , $\Delta gtr2$          | TB50, Tor1-D330-3xGFP, <i>gtr1</i> ::[HpH], <i>gtr2</i> ::[TRP1]                 | This study       |
| RL171-2a  | Kog1-TAP                                           | TB50 $\alpha$ , Kog1-TAP::[HIS3MX6]                                              | This study       |
| RL171-2d  | Kog1-TAP                                           | TB50 $\alpha$ , Kog1-TAP::[HIS3MX6]                                              | This study       |
| RL170-2b  | Tco89-TAP                                          | TB50 $\alpha$ , Tco89-TAP::[KITrp1]                                              | This study       |
| RL170-2c  | Tco89-TAP                                          | TB50 $\alpha$ , Tco89-TAP::[KITrp1]                                              | This study       |
| RL2595    | GFP-Kog1, Gln1-mCherry                             | TB50 $\alpha$ , GFP(S65T)-Kog1, Gln1-mCherry::[HpH]                              | This study       |
