# Supplementary material
Source: PubMed Central journal article supplement (PMC5640987)

Figure 1e

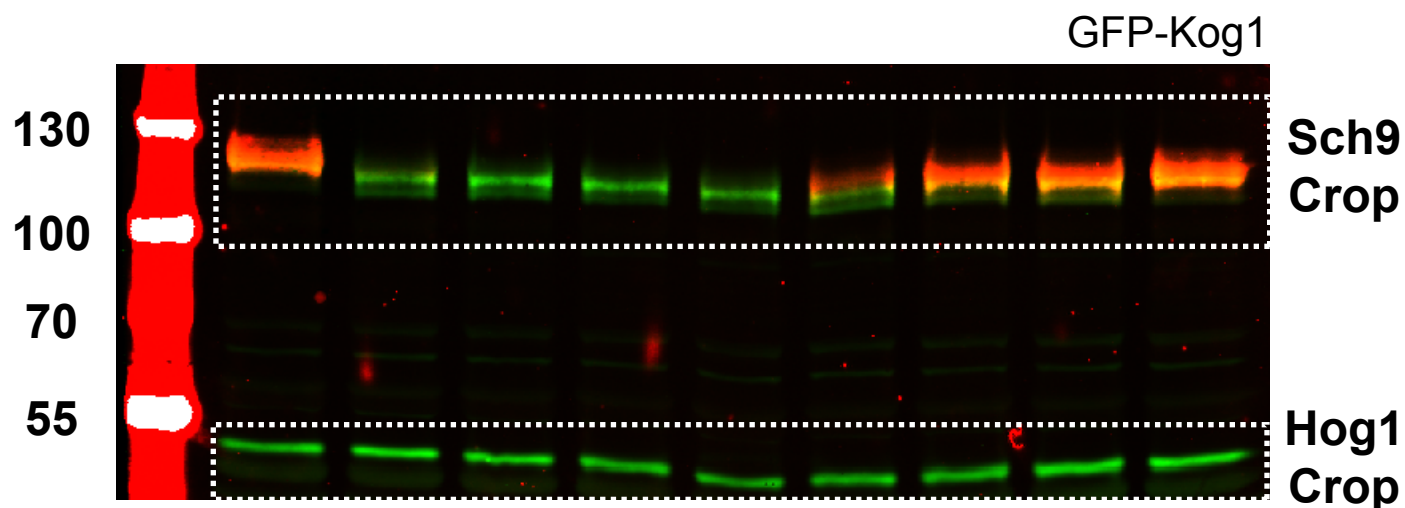

Figure 1k

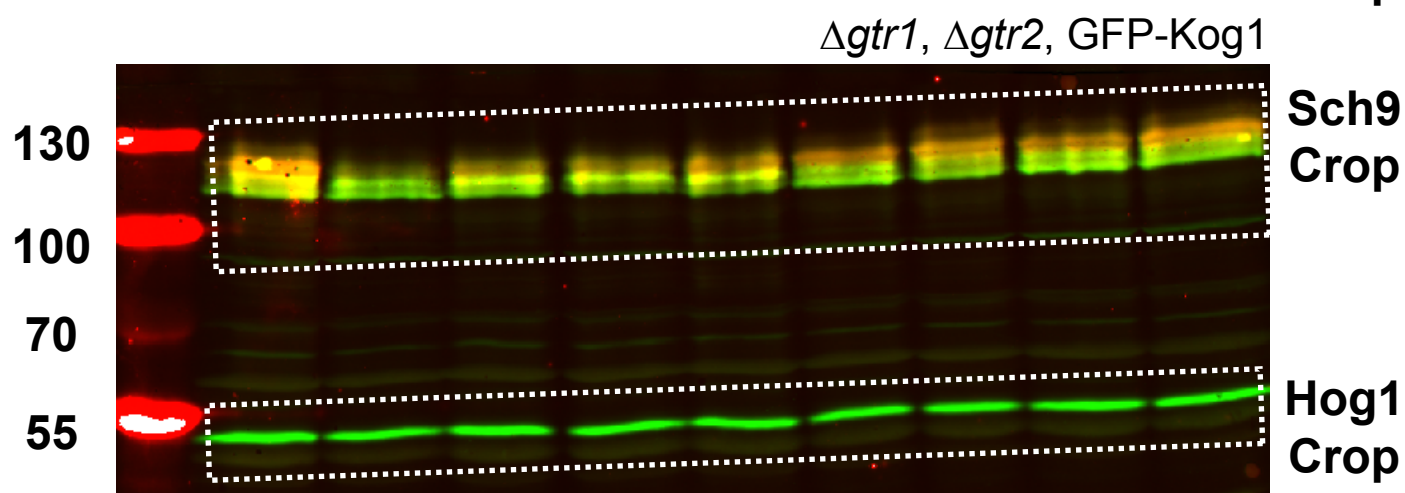

Figure 5b

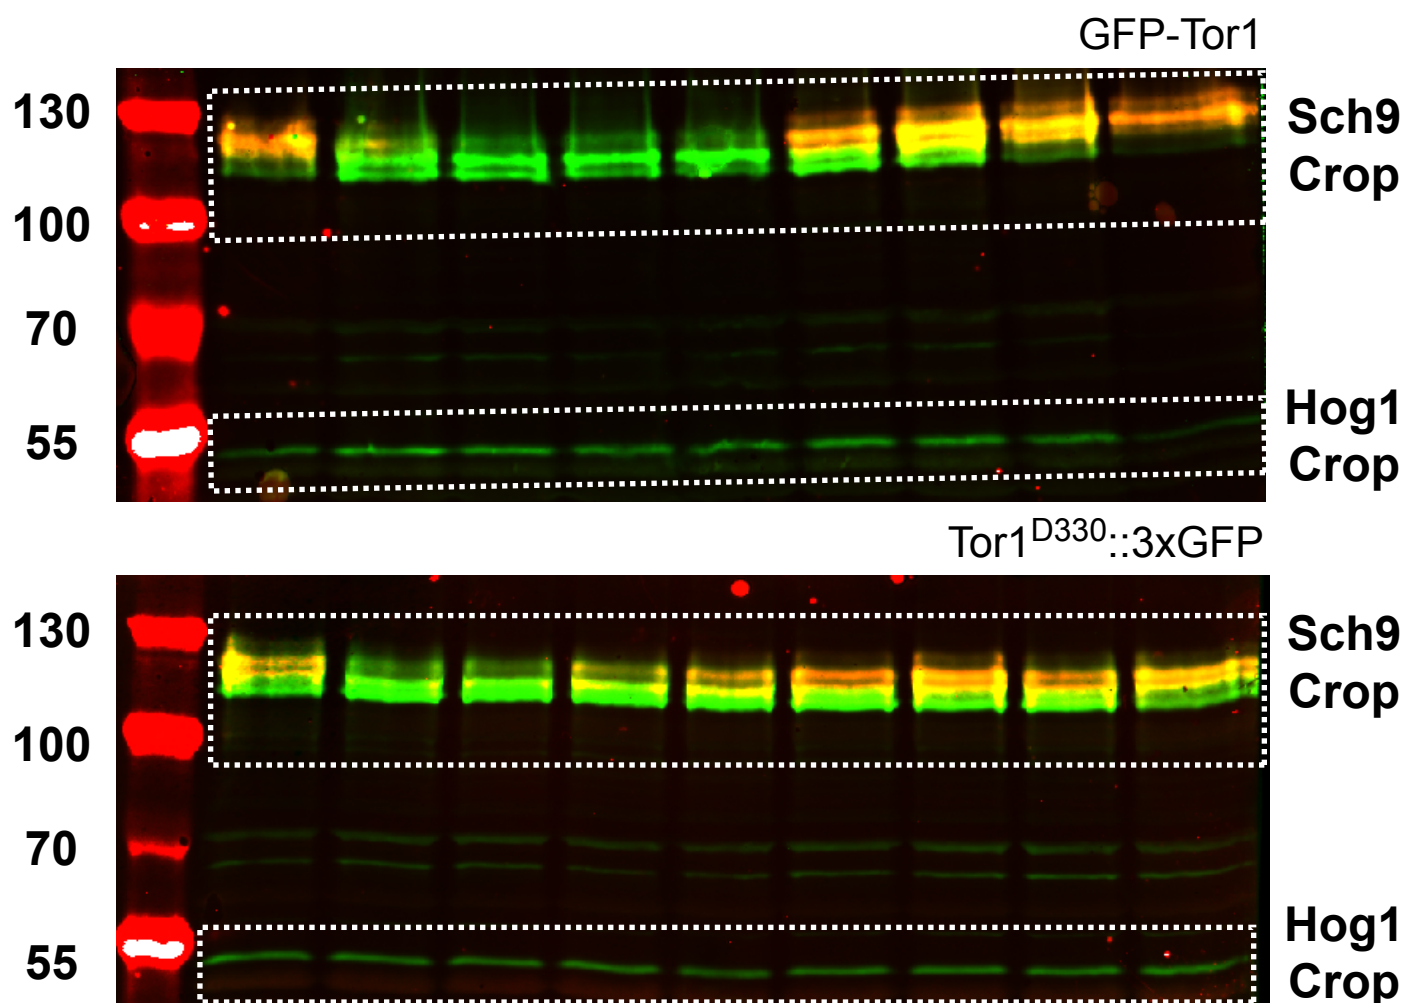

Supplementary Information Figure 1

Supplement: NIHMS73860-supplement-Supplementary_Information_Figure_1.pdf [file NIHMS73860-supplement-Supplementary_Information_Figure_1.pdf]
